# Supplementary material
Source: Springer Nature journal article supplement (https://www.springermedizin.de/resource/supplementary/12880_2013_215_MOESM3_ESM.pdf/9450248)
Supplement: MOESM3 [file 9450248]

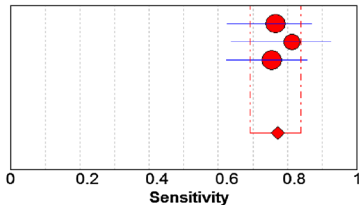

|                       | Sensitivity (95% CI) |               |
|-----------------------|----------------------|---------------|
| Lee et al. (2011)     | 0.76                 | (0.63 - 0.87) |
| Du Toit et al. (2008) | 0.81                 | (0.64 - 0.93) |
| Struijs et al. (2005) | 0.75                 | (0.62 - 0.86) |

Pooled Sensitivity = 0.77 (0.69 to 0.84)  
 Chi-square = 0.43; df = 2 (p = 0.8082)  
 Inconsistency (I-square) = 0.0 %

A

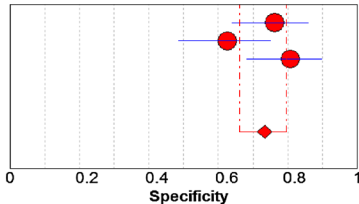

|                       | Specificity (95% CI) |               |
|-----------------------|----------------------|---------------|
| Lee et al. (2011)     | 0.76                 | (0.64 - 0.86) |
| Du Toit et al. (2008) | 0.63                 | (0.49 - 0.75) |
| Struijs et al. (2005) | 0.81                 | (0.68 - 0.90) |

Pooled Specificity = 0.73 (0.66 to 0.80)  
 Chi-square = 5.09; df = 2 (p = 0.0784)  
 Inconsistency (I-square) = 60.7 %

B
